# Supplementary material for: A Theoretical Study of the C–X Bond Cleavage Mediated by Cob(II)Aloxime
Source: MDPI journal article supplement (doi:10.3390/molecules27217283), 2022-10-26
Supplement: s1 [file s1]

# Supporting Information

A theoretical study of the C–X bond cleavage mediated by Cob(II)aloxime

Luis E. Seijas<sup>1</sup>, Cesar H. Zambrano<sup>2</sup>, Vladimir Rodríguez<sup>3</sup>, Jorge Alí-Torres<sup>4</sup>, Luis Rincón<sup>2</sup>, and F. Javier Torres<sup>1,2\*</sup>,

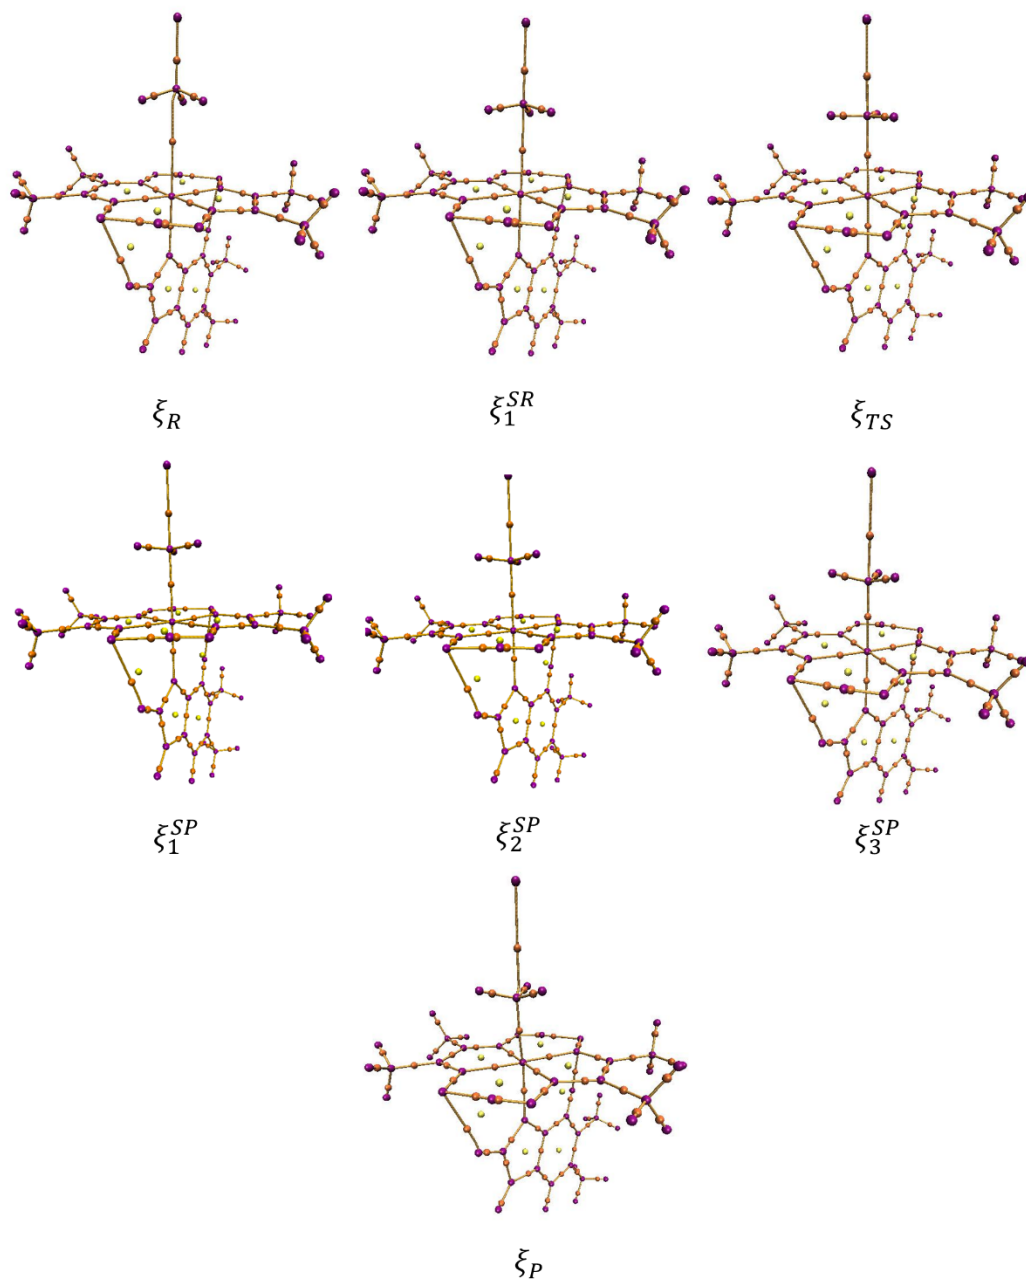

**Figure S1:** Localization of the critical points of  $\rho$  for the five IRC points indicated for the reaction mediated by CoIICbx.

**Table S1.** Source function description at the N–Co, Co–C, and C–Cl BCPs interactions measured at the IRC points  $\xi_R$ ,  $\xi_1^{SR}$ ,  $\xi_{TS}$ ,  $\xi_1^{SP}$ ,  $\xi_2^{SP}$ ,  $\xi_3^{SP}$ , and  $\xi_P$ , for the dehalogenation of chloromethane mediated by Cob<sup>II</sup>Cbx.

| IRC          | Interaction | $\rho(\mathbf{r}_{\text{BCP}})$ | $S(\mathbf{r}_{\text{BCP}},\text{N})^1$ | $S(\mathbf{r}_{\text{BCP}},\text{Co})^1$ | $S(\mathbf{r}_{\text{BCP}},\text{C})^1$ | $S(\mathbf{r}_{\text{BCP}},\text{Cl})^1$ | S%( $\mathbf{r}_{\text{BCP}},\text{N+Co}$ ) | S%( $\mathbf{r}_{\text{BCP}},\text{Co+C}$ ) | S%( $\mathbf{r}_{\text{BCP}},\text{C+Cl}$ ) |
|--------------|-------------|---------------------------------|-----------------------------------------|------------------------------------------|-----------------------------------------|------------------------------------------|---------------------------------------------|---------------------------------------------|---------------------------------------------|
| $\xi_R$      | N–Co        | $7.94 \times 10^{-02}$          | $1.77 \times 10^{-03}$                  | $1.90 \times 10^{-02}$                   | ---                                     | ---                                      | 25.97                                       | ---                                         | ---                                         |
|              | Co–C        | $8.41 \times 10^{-03}$          | ---                                     | $-7.82 \times 10^{-03}$                  | $-1.02 \times 10^{-02}$                 | ---                                      | ---                                         | -213.8                                      | ---                                         |
|              | C–Cl        | $1.69 \times 10^{-01}$          | ---                                     | ---                                      | $5.77 \times 10^{-02}$                  | $8.46 \times 10^{-02}$                   | ---                                         | ---                                         | 83.65                                       |
| $\xi_1^{SR}$ | N–Co        | $7.28 \times 10^{-02}$          | $1.76 \times 10^{-02}$                  | $1.68 \times 10^{-02}$                   | ---                                     | ---                                      | 46.45                                       | ---                                         | ---                                         |
|              | Co–C        | $1.85 \times 10^{-02}$          | ---                                     | $-8.12 \times 10^{-03}$                  | $-1.01 \times 10^{-02}$                 | ---                                      | ---                                         | -98.81                                      | ---                                         |
|              | C–Cl        | $1.03 \times 10^{-01}$          | ---                                     | ---                                      | $2.62 \times 10^{-02}$                  | $5.10 \times 10^{-02}$                   | ---                                         | ---                                         | 75.14                                       |
| $\xi_{TS}$   | N–Co        | $7.69 \times 10^{-02}$          | $2.03 \times 10^{-02}$                  | $1.69 \times 10^{-02}$                   | ---                                     | ---                                      | 47.96                                       | ---                                         | ---                                         |
|              | Co–C        | $4.84 \times 10^{-02}$          | ---                                     | $-3.41 \times 10^{-03}$                  | $-4.14 \times 10^{-03}$                 | ---                                      | ---                                         | -27.27                                      | ---                                         |
|              | C–Cl        | $4.92 \times 10^{-02}$          | ---                                     | ---                                      | $6.52 \times 10^{-04}$                  | $2.29 \times 10^{-02}$                   | ---                                         | ---                                         | 48.61                                       |
| $\xi_1^{SP}$ | N–Co        | $7.77 \times 10^{-02}$          | $2.06 \times 10^{-02}$                  | $1.60 \times 10^{-02}$                   | ---                                     | ---                                      | 47.57                                       | ---                                         | ---                                         |
|              | Co–C        | $5.44 \times 10^{-02}$          | ---                                     | $7.04 \times 10^{-03}$                   | $4.59 \times 10^{-03}$                  | ---                                      | ---                                         | 21.34                                       | ---                                         |
|              | C–Cl        | $4.27 \times 10^{-02}$          | ---                                     | ---                                      | $-2.51 \times 10^{-03}$                 | $1.97 \times 10^{-02}$                   | ---                                         | ---                                         | 40.25                                       |
| $\xi_2^{SP}$ | N–Co        | $7.62 \times 10^{-02}$          | $2.00 \times 10^{-02}$                  | $1.58 \times 10^{-02}$                   | ---                                     | ---                                      | 47.06                                       | ---                                         | ---                                         |
|              | Co–C        | $5.90 \times 10^{-02}$          | ---                                     | $8.98 \times 10^{-03}$                   | $6.84 \times 10^{-03}$                  | ---                                      | ---                                         | 26.79                                       | ---                                         |
|              | C–Cl        | $3.60 \times 10^{-02}$          | ---                                     | ---                                      | $-4.60 \times 10^{-03}$                 | $1.68 \times 10^{-02}$                   | ---                                         | ---                                         | 33.95                                       |
| $\xi_3^{SP}$ | N–Co        | $7.56 \times 10^{-02}$          | $1.98 \times 10^{-02}$                  | $1.59 \times 10^{-02}$                   | ---                                     | ---                                      | 46.65                                       | ---                                         | ---                                         |
|              | Co–C        | $8.07 \times 10^{-02}$          | ---                                     | $9.08 \times 10^{-03}$                   | $7.69 \times 10^{-03}$                  | ---                                      | ---                                         | 37.06                                       | ---                                         |
|              | C–Cl        | $2.57 \times 10^{-02}$          | ---                                     | ---                                      | $-8.80 \times 10^{-03}$                 | $1.04 \times 10^{-02}$                   | ---                                         | ---                                         | 12.47                                       |
| $\xi_P$      | N–Co        | $7.63 \times 10^{-02}$          | $2.02 \times 10^{-02}$                  | $1.59 \times 10^{-02}$                   | ---                                     | ---                                      | 46.38                                       | ---                                         | ---                                         |
|              | Co–C        | $9.44 \times 10^{-02}$          | ---                                     | $2.34 \times 10^{-02}$                   | $2.40 \times 10^{-02}$                  | ---                                      | ---                                         | 50.09                                       | ---                                         |
|              | C–Cl        | $1.66 \times 10^{-02}$          | ---                                     | ---                                      | $-9.69 \times 10^{-03}$                 | $7.59 \times 10^{-03}$                   | ---                                         | ---                                         | -13.02                                      |

<sup>1</sup> All the values are given in e a<sub>0</sub><sup>-3</sup>.

**Table S2.** Source function description at the N–Co, Co–C, and C–Cl BCPs interactions measured in the IRC points  $\xi_R$ ,  $\xi_1^{SR}$ ,  $\xi_{TS}$ ,  $\xi_1^{SP}$ , and  $\xi_P$  for the dehalogenation of chloromethane mediated by Co<sup>I</sup>Cbx.

| IRC          | Interaction | $\rho(r_{BCP})$        | $S(r_{BCP},N)^1$       | $S(r_{BCP},Co)^1$       | $S(r_{BCP},C)^1$        | $S(r_{BCP},Cl)^1$      | $S\%(r_{BCP},N+Co)$ | $S\%(r_{BCP},Co+C)$ | $S\%(r_{BCP},C+Cl)$ |
|--------------|-------------|------------------------|------------------------|-------------------------|-------------------------|------------------------|---------------------|---------------------|---------------------|
| $\xi_R$      | N–Co        | $1.00 \times 10^{-01}$ | $3.17 \times 10^{-02}$ | $3.00 \times 10^{-02}$  | ---                     | ---                    | 60.03               | ---                 | ---                 |
|              | Co–C        | $1.07 \times 10^{-02}$ | ---                    | $-7.71 \times 10^{-03}$ | $-1.04 \times 10^{-02}$ | ---                    | ---                 | -169.05             | ---                 |
|              | C–Cl        | $1.64 \times 10^{-01}$ | ---                    | ---                     | $5.40 \times 10^{-02}$  | $8.18 \times 10^{-02}$ | ---                 | ---                 | 82.69               |
| $\xi_1^{SR}$ | N–Co        | $9.53 \times 10^{-02}$ | $2.89 \times 10^{-02}$ | $2.72 \times 10^{-02}$  | ---                     | ---                    | 57.72               | ---                 | ---                 |
|              | Co–C        | $1.94 \times 10^{-02}$ | ---                    | $-6.25 \times 10^{-03}$ | $-1.01 \times 10^{-02}$ | ---                    | ---                 | -84.41              | ---                 |
|              | C–Cl        | $1.24 \times 10^{-01}$ | ---                    | ---                     | $3.50 \times 10^{-02}$  | $6.16 \times 10^{-02}$ | ---                 | ---                 | 77.89               |
| $\xi_{TS}$   | N–Co        | $9.22 \times 10^{-02}$ | $2.59 \times 10^{-02}$ | $2.71 \times 10^{-02}$  | ---                     | ---                    | 56.27               | ---                 | ---                 |
|              | Co–C        | $2.71 \times 10^{-02}$ | ---                    | $-3.57 \times 10^{-03}$ | $-7.43 \times 10^{-03}$ | ---                    | ---                 | -40.43              | ---                 |
|              | C–Cl        | $8.78 \times 10^{-02}$ | ---                    | ---                     | $1.80 \times 10^{-02}$  | $4.28 \times 10^{-02}$ | ---                 | ---                 | 69.48               |
| $\xi_1^{SP}$ | N–Co        | $8.42 \times 10^{-02}$ | $2.30 \times 10^{-02}$ | $2.15 \times 10^{-02}$  | ---                     | ---                    | 51.73               | ---                 | ---                 |
|              | Co–C        | $5.94 \times 10^{-02}$ | ---                    | $9.01 \times 10^{-03}$  | $8.02 \times 10^{-03}$  | ---                    | ---                 | 28.60               | ---                 |
|              | C–Cl        | $3.66 \times 10^{-02}$ | ---                    | ---                     | $-6.55 \times 10^{-03}$ | $1.67 \times 10^{-02}$ | ---                 | ---                 | 15.73               |
| $\xi_P$      | N–Co        | $7.25 \times 10^{-02}$ | $1.79 \times 10^{-02}$ | $1.39 \times 10^{-02}$  | ---                     | ---                    | 42.61               | ---                 | ---                 |
|              | Co–C        | $1.25 \times 10^{-01}$ | ---                    | $3.88 \times 10^{-02}$  | $3.81 \times 10^{-02}$  | ---                    | ---                 | 61.16               | ---                 |
|              | C–Cl        | $9.99 \times 10^{-03}$ | ---                    | ---                     | $-3.41 \times 10^{-03}$ | $6.86 \times 10^{-03}$ | ---                 | ---                 | -48.95              |

<sup>1</sup> All the values are given in e a<sup>0-3</sup>.

**Table S3.** Atomic distances  $D_{\text{Co-C}}$  and  $D_{\text{C-Cl}}$  for reactions mediated by  $\text{Co}^{\text{I}}\text{Cbx}$  and  $\text{Co}^{\text{II}}\text{Cbx}$ , at the IRC points indicated.

|                                   | <b>D</b> | $\xi_R$ | $\xi_1^{SR}$ | $\xi_{TS}$ | $\xi_1^{SP}$ | $\xi_2^{SP}$ | $\xi_3^{SP}$ | $\xi_P$ |
|-----------------------------------|----------|---------|--------------|------------|--------------|--------------|--------------|---------|
| $\text{Co}^{\text{I}}\text{Cbx}$  | Co–C     | 3.20    | 2.84         | 2.71       | 2.36         | --           | --           | 1.95    |
|                                   | C–Cl     | 1.82    | 1.95         | 2.10       | 2.48         | --           | --           | 3.05    |
| $\text{Co}^{\text{II}}\text{Cbx}$ | Co–C     | 3.19    | 2.64         | 2.38       | 2.33         | 2.27         | 2.14         | 2.05    |
|                                   | C–Cl     | 1.81    | 2.06         | 2.37       | 2.43         | 2.50         | 2.66         | 2.98    |
